# Supplementary material for: Compiled records of carbon isotopes in atmospheric CO 2 for historical simulations in CMIP6
Source: Copernicus journal article supplement (doi:10.5194/gmd-10-4405-2017), 2017-12-05
Supplement: Supplementary file 1 [file gmd-10-4405-2017-supplement.zip]

Table S3. Summary of  $\Delta^{14}\text{CO}_2$  records used in the compilation for different time periods. IntCal13 and SHCal13 refer to the compilations of Reimer et al. (2013) and Hogg et al. (2013). Stations listed without a reference refer to measurements from the Heidelberg University network (Levin et al. 2010). Additional references are given in the text.

| Period                                        | SH                                                       | Period    | Tropics                                                                   | Period    | NH                                           |
|-----------------------------------------------|----------------------------------------------------------|-----------|---------------------------------------------------------------------------|-----------|----------------------------------------------|
| 1850-1939                                     | SHCal13                                                  | 1850-1939 | Average of SHCal13 and IntCal13                                           | 1850-1939 | IntCal13                                     |
| 1940-1950                                     | IntCal13                                                 | 1940-1950 | IntCal13                                                                  | 1940-1950 | IntCal13                                     |
| 1951-54                                       | Stuiver and Quay (1981)                                  | 1951-54   | Stuiver and Quay (1981)                                                   | 1951-54   | Stuiver and Quay (1981)                      |
| 1955-1983                                     | Wellington (Manning and Melhuish 1994), adjusted by -4 ‰ | 1955-1984 | Average of NH and SH, adjusted by box model from Naegler and Levin (2006) | 1955-58   | Tropospheric data compiled by Tans (1981)    |
|                                               |                                                          |           |                                                                           | 1959-1984 | Vermunt                                      |
| 1984-1992, 2000-02, 2004-06, 2010 and 2012-14 | Average of Neumayer and Cape Grim, adjusted by -1.2 ‰    | 1985-90   | NH, adjusted by +2.9 ‰                                                    | 1985-88   | Izaña, adjusted by -0.9 ‰                    |
| 1993-99, 2003, 2007-09 and 2011               | Average of Neumayer, Cape Grim and Macquarie Island      | 1991-97   | Mérida                                                                    | 1989-1997 | Average of Izaña, Jungfraujoch, and Alert    |
|                                               |                                                          | 1998-2015 | NH, adjusted by +2.9 ‰                                                    | 1997-2010 | Average of Jungfraujoch, Alert and Mace Head |
| 2015                                          | Neumayer, adjusted by -2 ‰                               |           |                                                                           |           | 2011-15                                      |
