# Supplementary material for: Compiled records of carbon isotopes in atmospheric CO 2 for historical simulations in CMIP6
Source: Copernicus journal article supplement (doi:10.5194/gmd-10-4405-2017), 2017-12-05
Supplement: Supplementary file 2 [file gmd-10-4405-2017-supplement.zip]

Supplement of Geosci. Model Dev., 10, 4405–4417, 2017  
<https://doi.org/10.5194/gmd-10-4405-2017-supplement>  
© Author(s) 2017. This work is distributed under  
the Creative Commons Attribution 4.0 License.

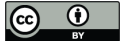

*Supplement of*

## **Compiled records of carbon isotopes in atmospheric CO<sub>2</sub> for historical simulations in CMIP6**

**Heather Graven et al.**

*Correspondence to:* Heather Graven ([h.graven@imperial.ac.uk](mailto:h.graven@imperial.ac.uk))

- [gmd-10-4405-2017-supplement-title-page.pdf](#)
- [TableS1.csv](#)
- [TableS2.csv](#)
- [TableS3.pdf](#)

The copyright of individual parts of the supplement might differ from the CC BY 4.0 License.
